# Supplementary material for: Increases of M2a macrophages and fibrosis in aging muscle are influenced by bone marrow aging and negatively regulated by muscle-derived nitric oxide
Source: PubMed Central journal article supplement (PMC4531081; doi:10.1111/acel.12350), 2015-05-25

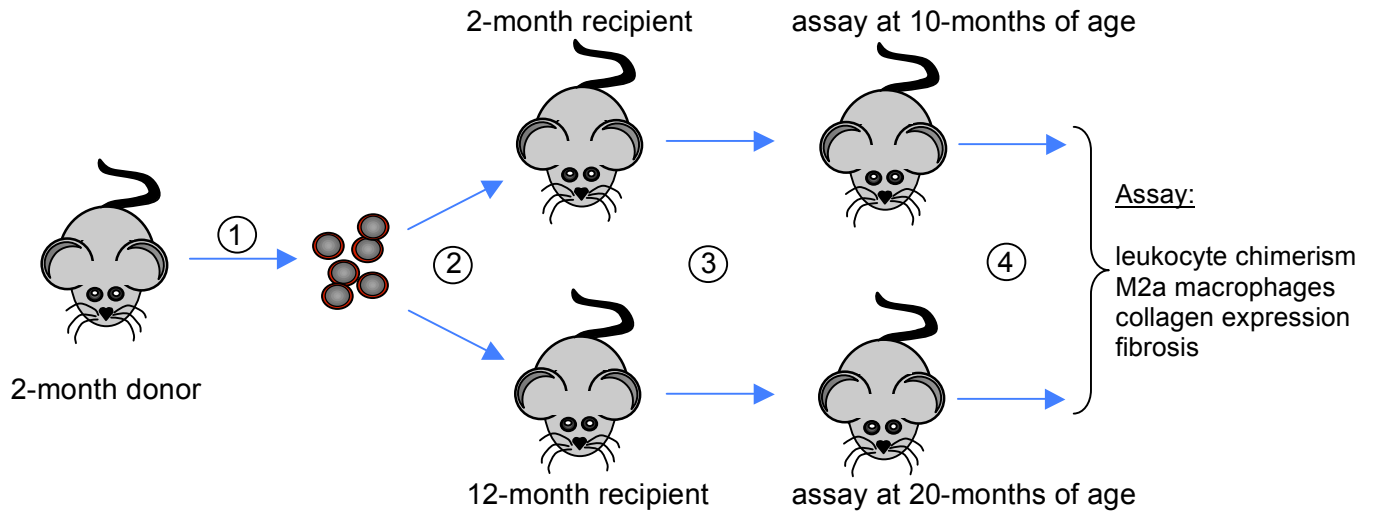

Supplement: acel0014-0678-sd1.pdf [file acel0014-0678-sd1.pdf]
